# Supplementary material for: Telomerase activity detection in cancer cellsviaprimer extension-mediated fluorescence enhancement of silver nanoclusters
Source: Royal Society of Chemistry journal article supplement (doi:10.1039/c8ay00323h), 2018-01-01
Supplement: c8ay00323h1.pdf [file c8ay00323h1.pdf]

## ***Electronic Supplementary Information (ESI)***

### **Telomerase Activity Detection in Cancer Cell via Primer Extension- Mediated Fluorescence Enhancement of Silver Nanoclusters**

Xu Li,<sup>a,\*</sup> Wenxiang Wang,<sup>b,\*</sup> Desong Yang,<sup>b</sup> Jie Wu,<sup>b</sup> Baihua Zhang,<sup>b</sup> Zhining Wu<sup>b</sup> and Jinming Tang<sup>b</sup>

<sup>a</sup>Department of Thoracic Surgery, The Second Xiangya Hospital of Central South University, Changsha, Hunan, China 410011.

<sup>b</sup>The Second Department of Thoracic Surgery, Hunan Cancer Hospital and The Affiliated Cancer Hospital of Xiangya School of Medicine, Central South University, Changsha, Hunan, China 410013.

\*To whom correspondence should be addressed:

E-mail: [lixu@hnszlly.com](mailto:lixu@hnszlly.com); [WWangXia55@163.com](mailto:WWangXia55@163.com)

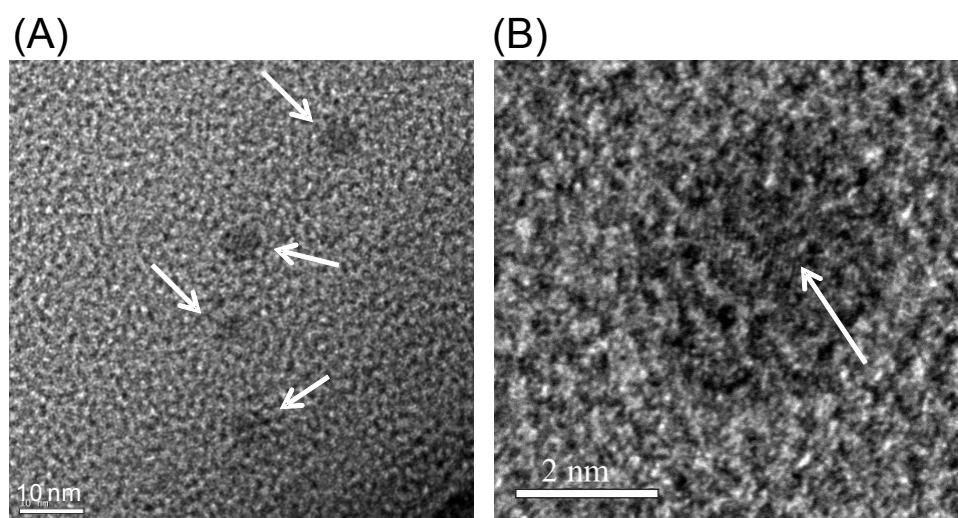

Fig. S1 (A) TEM images of AgNCs; (B) High-resolution TEM image of the crystal lattice (arrow) structure of the AgNCs formed.

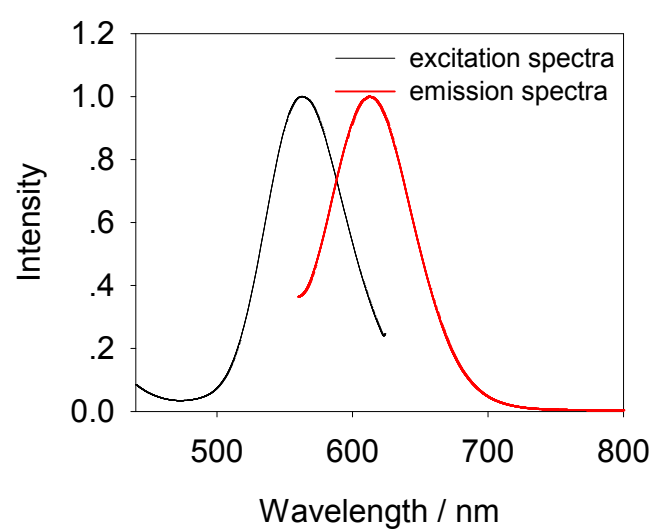

**Fig. S2** The excitation and emission spectra of AgNCs.

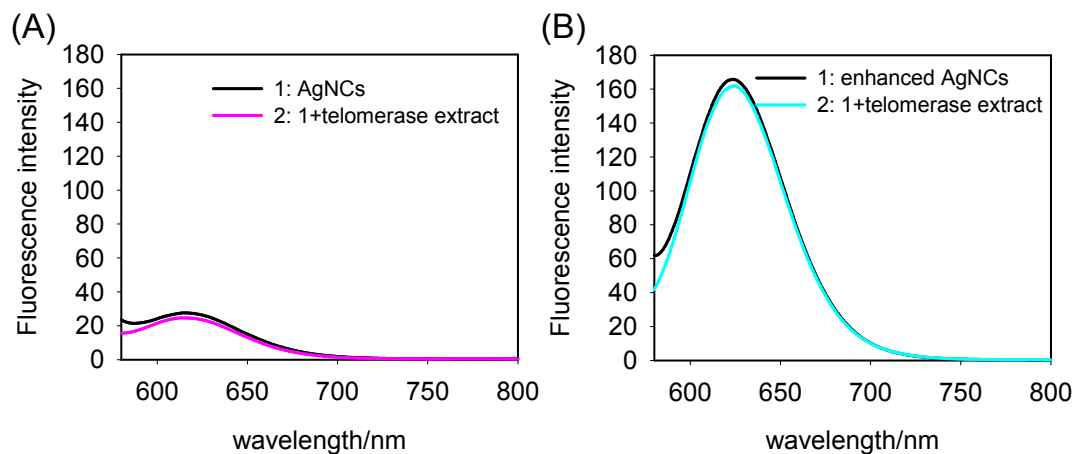

**Fig. S3** The effect of cell extracts on the fluorescence properties of AgNCs. No obvious effect on the fluorescence of AgNCs itself was observed from the un-inactivated cell extracts (A), and negligible effect on the fluorescence of AgNCs enhanced by G-rich DNA in proximity was observed from the un-inactivated cell extracts (B).

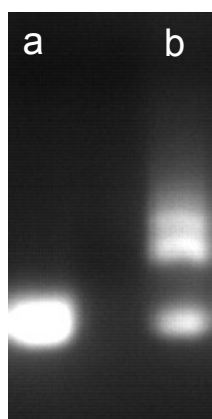

**Fig. S4** Direct characterization of the telomerase-catalyzed extension products by electrophoresis. a, the primer; b, the extension products.

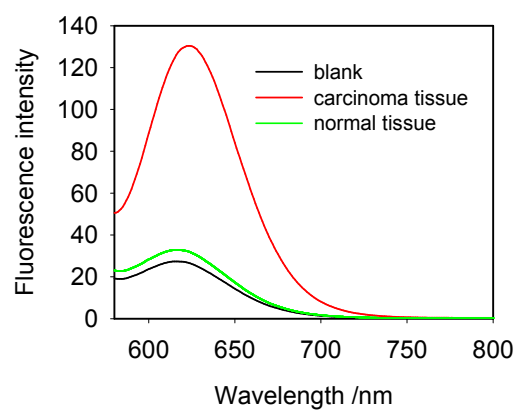

**Fig. S5** The feasibility of the presented method for the real tissue samples. A tumor was first implanted in a nude mice, telomerase was respectively extracted from carcinoma tissue or normal tissue. Stronger fluorescence signal was detected for telomerase extracts of carcinoma tissue than normal tissue, indicating good feasibility of the presented method for the real samples.

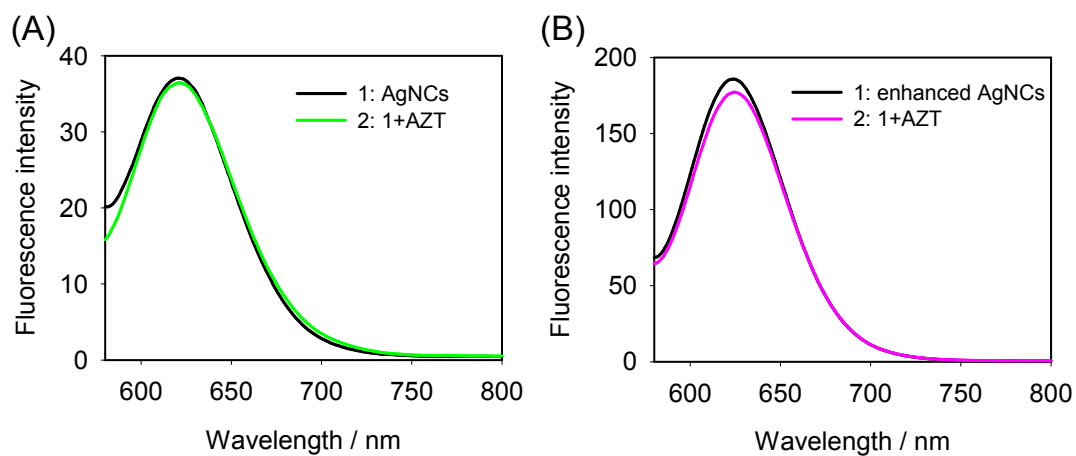

**Fig. S6** The effect of AZT itself on the fluorescence properties of AgNCs. No obvious effect on the fluorescence of AgNCs itself was observed from the AZT (A), and slight quenching effect on the fluorescence of AgNCs enhanced by G-rich DNA in proximity was observed from AZT (B).

**Table S1** Comparison of Our Proposed Method with Reported Telomerase Detection Methods.

| method          | system                                                                                                |                |           | detection<br>limit       | detection<br>time | reference                                         |
|-----------------|-------------------------------------------------------------------------------------------------------|----------------|-----------|--------------------------|-------------------|---------------------------------------------------|
| optical         | HRP-mimic<br>beacons                                                                                  | DNAzyme        | catalytic | 500 cells                | 1.5               | <i>J. Am. Chem. Soc.</i> 2004,<br>126, 7430–7431. |
| optical         | CdSe/ZnS<br>primer/Texas red-dUTP                                                                     | QDs/telomerase |           | 1000 cells               | 3.5               | <i>Analyst</i> 2008, 133,<br>1593–1598            |
| optical         | CdSe/ZnS<br>primer/hemin                                                                              | QDs/telomerase |           | 269 cells/ $\mu\text{L}$ | 3.5               | <i>Anal. Chem.</i> 2010, 82,<br>8390–8397         |
| optical         | telomerase primer-modified Au<br>electrode/DNAzyme-functionalized<br>Au NPs                           |                |           | 1000 cells               | 2 day             | <i>Nano Lett.</i> 2004, 4,<br>1683–1687           |
| optical         | cantilevers/magnetic nanoparticles                                                                    |                |           | 100 cells                | 3 h               | <i>Cancer Res.</i> 2004, 64,<br>639–643.          |
| optical         | ZnP/telomerase/G-quadruplex                                                                           |                |           | 380 cells/ $\mu\text{L}$ | 3.5 h             | <i>Anal. Chem.</i> 2012, 84,<br>4789–4797         |
| electrochemical | telomerase primer-modified<br>electrode                                                               |                |           | 67 cells/ $\mu\text{L}$  | 3.5 h             | <i>Anal. Chem.</i> 2010, 82,<br>8390–8397.        |
| electrochemical | telomerase primer-modified Au<br>electrode- $\text{Fe}(\text{CN})_6^{3-}/\text{Fe}(\text{CN})_6^{4-}$ |                |           | 1000 cells               | 1 day             | <i>Chem. Commun.</i> 2011, 47,<br>3129–3131.      |
| optical         | AgNCs enhanced by the extended<br>products catalyzed by telomerase                                    |                |           | 62 cells                 | ~2 h              | present study                                     |
